# Supplementary material
Source: PubMed Central journal article supplement (PMC5657543)

Fig1

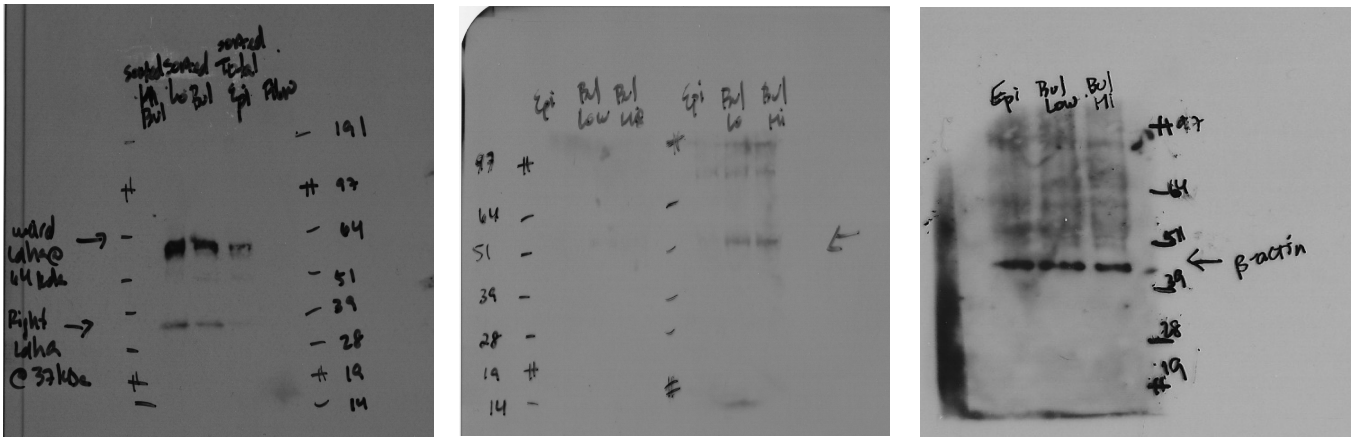

Fig 4

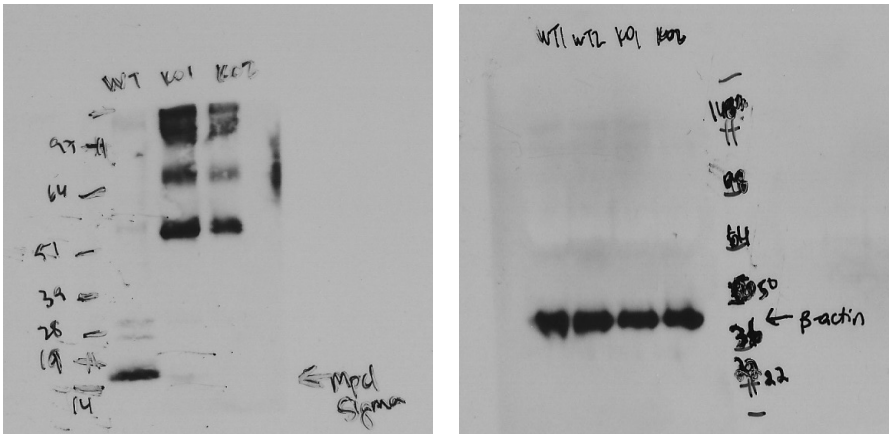

Fig 6

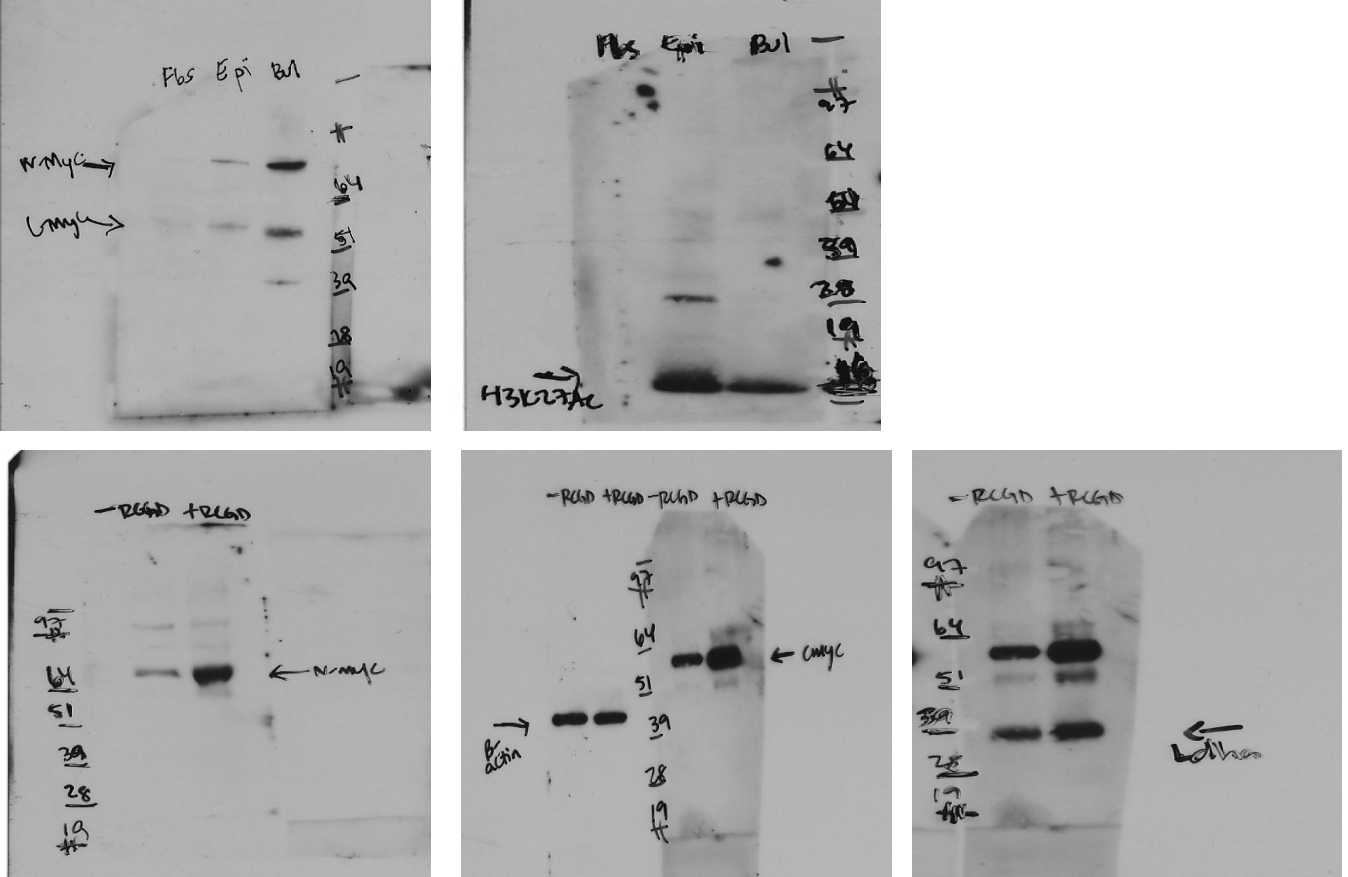

Supplement: NIHMS886416-supplement-7.pdf [file NIHMS886416-supplement-7.pdf]
